# Supplementary material for: Comparative Effectiveness of Persistent Use of a Name-Brand Levothyroxine (Synthroid®) vs. Persistent Use of Generic Levothyroxine on TSH Goal Achievement: A Retrospective Study Among Patients with Hypothyroidism in a Managed Care Setting
Source: PubMed Central journal article supplement — Adv Ther. 2021 Dec 14;39(1):779–95. doi: 10.1007/s12325-021-01969-3 (PMC8799578; doi:10.1007/s12325-021-01969-3), 2021-12-14
Supplement: 12325_2021_1969_MOESM1_ESM.pdf [file 12325_2021_1969_MOESM1_ESM.pdf]

**Comparative Effectiveness of Persistent Use of a Name-Brand Levothyroxine (Synthroid®) vs Persistent Use of Generic Levothyroxine on TSH Goal Achievement: A Retrospective Study Among Patients with Hypothyroidism in a Managed Care Setting**

Authors:

Liya Wang<sup>1</sup>, Yaozhu J. Chen<sup>2</sup>, Michael Grabner<sup>1</sup>, Bal Nepal<sup>1</sup>, Amit Bodhani<sup>2</sup>, Ramon Espaillat<sup>2</sup>, James V. Hennessey<sup>3</sup>

<sup>1</sup>*HealthCore, Inc, Wilmington, DE, USA*

<sup>2</sup>*AbbVie, North Chicago, IL, USA*

<sup>3</sup>*Beth Israel Deaconess Medical Center, Boston, MA, USA*

**Corresponding Author**

Michael Grabner, PhD

HealthCore, Inc.

123 Justison Street, Suite 200

Wilmington, DE 19801

USA

Phone: (302) 230-2000

Email: [mgrabner@healthcore.com](mailto:mgrabner@healthcore.com)

## SUPPLEMENTARY MATERIAL

**Table 1: Conditions of Interest**

| Condition                  | ICD-9-CM Diagnosis Code                | ICD-10-CM Diagnosis Code                  |
|----------------------------|----------------------------------------|-------------------------------------------|
| Hypothyroidism             | 244.0x, 244.1x, 244.8x, 244.9x         | E01.8%, E03.8%, E89.0%, E03.9%            |
| Thyroid cancer             | 193.xx, V10.87                         | C73.%, D44.0%, Z85.850%                   |
| Pregnancy                  | 630.xx to 679.xx, V22.xx to V24.xx     | O00.% to O9A.%, Z32.% to Z3A.%            |
| Alopecia                   | 704.0x                                 | L63%, L64%, L65%, L66%,                   |
| Anemia                     | 280.xx to 285.xx                       | D50.0% to D64%,                           |
| Celiac disease             | 579.0x                                 | K90.0%                                    |
| Constipation               | 564.0x                                 | K59.0%                                    |
| Goiter                     | 240.xx to 242.3x                       | E01.0% to E01.2%, E04%                    |
| Hyperlipidemia             | 272.0, 272.1, 272.2, 272.3, 272.4      | E78.0, E78.1, E78.2, E78.3, E78.4, E78.5  |
| Hypertension               | 401.xx, 402.xx, 403.xx, 404.xx, 405.xx | I10%, I11%, I12%, I13%, I15%              |
| Inflammatory bowel disease | 555.xx, 556.xx                         | K50%, K51%                                |
| Obesity                    | 278.0x, V85.3x, V85.4x                 | E66.0%, E66.1%, E66.2%, E66.8%,<br>E66.9% |
| Psoriasis                  | 696.1x                                 | L40                                       |
| Rheumatoid arthritis       | 714.0x, 714.1x, 714.2x                 | M05%, M06%                                |
| Urticaria                  | 708.x                                  | L50%                                      |

**Table 2: Independent baseline variables included in the logistic regression model for propensity scores**

Age in years (continuous)  
 Female vs. Male  
 Health plan type (categorical)  
 Medicare Advantage plan vs. Commercial  
 Region of patient residence (categorical)  
 Index year (categorical)  
 Provider specialty on index prescription claim (categorical)  
 Quan-Charlson Comorbidity Index (continuous)  
 Goiter (yes vs. no)  
 Hypertension (yes vs. no)  
 Hypothyroidism-related outpatient services (yes vs. no)  
 Fill mechanism on index prescription claim (mail vs. retail)  
 Hypothyroidism-related pharmacy dispensing (yes vs. no)

Number of hypothyroidism-related pharmacy claims per patient (continuous)

**Table 3: Independent baseline variables included in the regression model for achievers vs. non-achievers**

TSH goal achievers (yes vs. no)

Synthroid vs. GL cohort

Age in years (40<65 vs. 18<40; 65<75 vs. 18<40; ≥75 vs. 18<40)

Female vs. Male

Health plan type: PPO vs. HMO; CDHP vs. HMO; Other vs. HMO

Region of patient residence: Midwest vs. Northeast; South vs. Northeast; West vs. Northeast; Missing/Unknown vs. Northeast

Index year: 2007 vs. 2006; 2008 vs. 2006; 2009 vs. 2006; 2010 vs. 2006; 2011 vs. 2006; 2012 vs. 2006; 2013 vs. 2006; 2014 vs. 2006; 2015 vs. 2006; 2016 vs. 2006

Provider specialty on index prescription claim: PCP vs. Endocrinologist; Others/unknown vs. Endocrinologist

Quan-Charlson Comorbidity Index: 1 vs. 0; 2 vs. 0; 3+ vs. 0

Goiter (yes vs. no)

Hypertension (yes vs. no)

Alopecia (yes vs. no)

Hyperlipidemia (yes vs. no)

Hypothyroidism-related inpatient hospitalizations (yes vs. no)

Hypothyroidism-related pharmacy dispensing (yes vs. no)

All-cause outpatient services cost (in thousands)

All-cause pharmacy cost (in thousands)

All-cause medical and pharmacy cost (in thousands)

Hypothyroidism-related inpatient cost (in thousands)

Hypothyroidism-related ER cost (in thousands)

Hypothyroidism-related outpatient services cost (in thousands)

Hypothyroidism-related medical and pharmacy cost (in thousands)

*CDHP=consumer-driven health plan; GL=generic levothyroxine; HMO=health maintenance organization; PCP=primary care physician; PPO=preferred provider organization; SD=standard deviation; TSH=thyroid stimulating hormone*

**Table 4. TSH Achievers vs Non-Achievers: Patient Demographics and Clinical Characteristics**

| Demographic and clinical characteristics                      | TSH Goal Achievers | TSH Goal Non-Achievers | Standardized Difference <sup>a</sup> |
|---------------------------------------------------------------|--------------------|------------------------|--------------------------------------|
|                                                               | (n=49,916)         | (n=14,880)             |                                      |
|                                                               | n (%) / Mean (SD)  | n (%) / Mean (SD)      |                                      |
| Age at index (years), mean (SD), median (IQR)                 | 53.9 (12.69)       | 54.1 (12.94)           | -0.016                               |
| Age categories, n (%)                                         |                    |                        |                                      |
| 18 – 39                                                       | 5,871 (11.8)       | 1,715 (11.5)           | 0.007                                |
| 40 – 64                                                       | 36,112 (72.3)      | 10,680 (71.8)          | 0.013                                |
| 65 – 74                                                       | 4,920 (9.9)        | 1,444 (9.7)            | 0.005                                |
| ≥75                                                           | 3,013 (6.0)        | 1,041 (7.0)            | -0.039                               |
| Female, n (%)                                                 | 38,825 (77.8)      | 10,525 (70.7)          | 0.162                                |
| Health plan type, n (%)                                       |                    |                        |                                      |
| PPO                                                           | 28,515 (57.1)      | 8,472 (56.9)           | 0.004                                |
| HMO                                                           | 17,529 (35.1)      | 5,354 (36.0)           | -0.018                               |
| CDHP                                                          | 3,869 (7.8)        | 1,054 (7.1)            | 0.025                                |
| Medicare Advantage plan, n (%)                                | 6,705 (13.4)       | 2,161 (14.5)           | -0.031                               |
| Geographic region of residence, n (%)                         |                    |                        |                                      |
| Northeast                                                     | 12,053 (24.1)      | 3,690 (24.8)           | -0.015                               |
| Midwest                                                       | 9,559 (19.2)       | 2,845 (19.1)           | 0.001                                |
| South                                                         | 17,553 (35.2)      | 5,222 (35.1)           | 0.001                                |
| West                                                          | 10,744 (21.5)      | 3,115 (20.9)           | 0.014                                |
| Missing/Unknown                                               | 7 (<0.1)           | 8 (0.1)                | -0.022                               |
| Prescribing/treating physician specialty <sup>b</sup> , n (%) |                    |                        |                                      |
| PCP                                                           | 33,866 (67.8)      | 10,306 (69.3)          | -0.030                               |
| Endocrinologist                                               | 8,559 (17.1)       | 2,205 (14.8)           | 0.064                                |
| Others/Unknown                                                | 7,491 (15.0)       | 2,369 (15.9)           | -0.025                               |
| Comorbidities                                                 |                    |                        |                                      |
| QCI, mean (SD), median (IQR)                                  | 0.6 (1.22)         | 0.7 (1.35)             | -0.048                               |
| Other comorbidities of interest, n (%)                        |                    |                        |                                      |
| Alopecia                                                      | 883 (1.8)          | 186 (1.3)              | 0.043                                |
| Anemia                                                        | 4,522 (9.1)        | 1,403 (9.4)            | -0.013                               |
| Celiac disease                                                | 124 (0.2)          | 32 (0.2)               | 0.007                                |
| Constipation                                                  | 1,177 (2.4)        | 331 (2.2)              | 0.009                                |
| Goiter                                                        | 4,888 (9.8)        | 1,345 (9.0)            | 0.026                                |
| Hyperlipidemia                                                | 21,229 (42.5)      | 6,146 (41.3)           | 0.025                                |
| Hypertension                                                  | 18,010 (36.1)      | 5,500 (37.0)           | -0.018                               |
| Inflammatory bowel disease                                    | 292 (0.6)          | 84 (0.6)               | 0.003                                |
| Obesity                                                       | 3,281 (6.6)        | 963 (6.5)              | 0.004                                |

|                                               |                   |                   |        |
|-----------------------------------------------|-------------------|-------------------|--------|
| Psoriasis                                     | 412 (0.8)         | 109 (0.7)         | 0.011  |
| Rheumatoid arthritis                          | 735 (1.5)         | 225 (1.5)         | -0.003 |
| Urticaria                                     | 346 (0.7)         | 110 (0.7)         | -0.005 |
| Laboratory testing <sup>c</sup>               |                   |                   |        |
| Patients with TSH result, n (%)               | 31,967 (64.0)     | 9,357 (62.9)      | 0.024  |
| Mean (SD) [median] mIU/L                      | 5.3 (11.41) [3.2] | 8.8 (19.47) [4.8] | -0.221 |
| TSH results between 0.3 and 4.12 mIU/L, n (%) | 17,158 (34.4)     | 2,988 (20.1)      | 0.325  |

CDHP=consumer-driven health plan; HMO=health maintenance organization; PCP=primary care physician; PPO=preferred provider organization; QCI=Quan-Charlson Index score; SD=standard deviation; TSH=thyroid-stimulating hormone

<sup>a</sup>Standardized difference=difference in means or proportions divided by the pooled standard deviation. An absolute value of the standardized difference <0.1 was used to indicate balance in a variable across the cohorts.

<sup>b</sup>On index prescription claim.

<sup>c</sup>Last serum TSH lab result in the 6-month pre-index period.

**Table 5. TSH Achievers vs Non-Achievers: Costs at baseline and follow-up**

| Costs                                                      | 6-Month Baseline                                  |                                          | 12-Month Follow Up                   |                                          | p-Value <sup>b</sup><br>[A vs B] | p-Value <sup>b</sup><br>[C vs D] |
|------------------------------------------------------------|---------------------------------------------------|------------------------------------------|--------------------------------------|------------------------------------------|----------------------------------|----------------------------------|
|                                                            | TSH Goal Achievers <sup>a</sup> [A]<br>(n=49,916) | TSH Goal Non-Achievers [B]<br>(n=14,880) | TSH Goal Achievers [C]<br>(n=49,916) | TSH Goal Non-Achievers [D]<br>(n=14,880) |                                  |                                  |
|                                                            | n (%)/<br>Mean (SD)                               | n (%)/<br>Mean (SD)                      | n (%)/<br>Mean (SD)                  | n (%)/<br>Mean (SD)                      |                                  |                                  |
| <b>All-cause healthcare costs</b>                          |                                                   |                                          |                                      |                                          |                                  |                                  |
| Inpatient hospitalization, mean (SD)                       | \$1,981<br>(\$17,377)                             | \$2,505<br>(\$21,529)                    | \$2,046<br>(\$12,838)                | \$2,791<br>(\$15,228)                    | .853                             | .005                             |
| ED visits, mean (SD)                                       | \$195<br>(\$1,073)                                | \$181<br>(\$890)                         | \$326<br>(\$1,348)                   | \$334<br>(\$1,403)                       | .674                             | .511                             |
| Outpatient services, mean (SD) [median]                    | \$2,742<br>(\$7,026)<br>[\$996]                   | \$2,708<br>(\$6,641)<br>[\$884]          | \$5,412<br>(\$13,636)<br>[\$2,330]   | \$5,671<br>(\$14,622)<br>[\$2,130]       | .002                             | .071                             |
| Pharmacy costs, mean (SD) [median]                         | \$1,437<br>(\$3,574)<br>[\$541]                   | \$1,394<br>(\$3,856)<br>[\$491]          | \$3,396<br>(\$7,674)<br>[\$1,483]    | \$3,423<br>(\$8,922)<br>[\$1,403]        | .001                             | .234                             |
| Total medical costs <sup>d</sup> , mean (SD) [median]      | \$4,917<br>(\$19,548)<br>[\$1,122]                | \$5,393<br>(\$23,552)<br>[\$999]         | \$7,784<br>(\$20,912)<br>[\$2,614]   | \$8,797<br>(\$23,907)<br>[\$2,421]       | .168                             | .822                             |
| Total costs <sup>e</sup> , mean (SD) [median]              | \$6,355<br>(\$20,230)<br>[\$2,187]                | \$6,787<br>(\$24,185)<br>[\$2,043]       | \$11,180<br>(\$23,717)<br>[\$5,074]  | \$12,220<br>(\$27,062)<br>[\$4,791]      | .122                             | .795                             |
| <b>Hypothyroidism-related healthcare costs<sup>c</sup></b> |                                                   |                                          |                                      |                                          |                                  |                                  |
| Inpatient hospitalization, mean (SD)                       | \$897<br>(\$9,652)                                | \$1,038<br>(\$9,411)                     | \$1,250<br>(\$8,977)                 | \$1,683<br>(\$10,509)                    | .503                             | .001                             |
| ED visits, mean (SD)                                       | \$50<br>(\$590)                                   | \$45<br>(\$484)                          | \$93<br>(\$719)                      | \$98<br>(\$789)                          | .039                             | .849                             |
| Outpatient services, mean (SD) [median]                    | \$265<br>(\$1,598)<br>[\$90]                      | \$261<br>(\$1,182)<br>[\$89]             | \$650<br>(\$2,675)<br>[\$238]        | \$691<br>(\$2,587)<br>[\$251]            | .382                             | .585                             |
| Pharmacy fills, mean (SD) [median]                         | \$37<br>(\$52)<br>[\$20]                          | \$38<br>(\$54)<br>[\$19]                 | \$174<br>(\$116)<br>[\$146]          | \$180<br>(\$116)<br>[\$150]              | .983                             | .010                             |

|                                                       |                                 |                                 | IQR \$115                       | IQR \$114                        |      |      |
|-------------------------------------------------------|---------------------------------|---------------------------------|---------------------------------|----------------------------------|------|------|
| Total medical costs <sup>d</sup> , mean (SD) [median] | \$1,212<br>(\$9,815)<br>[\$101] | \$1,343<br>(\$9,505)<br>[\$101] | \$1,994<br>(\$9,553)<br>[\$261] | \$2,472<br>(\$11,035)<br>[\$280] | .341 | .023 |
| Total costs <sup>e</sup> , mean (SD) [median]         | \$1,249<br>(\$9,815)<br>[\$143] | \$1,382<br>(\$9,505)<br>[\$144] | \$2,168<br>(\$9,552)<br>[\$442] | \$2,653<br>(\$11,035)<br>[\$471] | .344 | .008 |

ED=emergency department; HCRU=healthcare resource utilization; SD=standard deviation; TSH=thyroid-stimulating hormone

<sup>a</sup>≥1 Serum TSH lab results between 0.3 and 4.12 mIU/L in 12 months of follow up.

<sup>b</sup>p-Values were based on t-tests for continuous variables and  $\chi^2$  test for categorical variables.

<sup>c</sup>Hypothyroidism-related healthcare utilization was based on medical claims with an ICD-9-CM diagnosis code of [244.0x, 244.1x, 244.8x, or 244.9x] or ICD-10-CM diagnosis code of [E01.8%, E03.8%, E89.0%, or E03.9%] and pharmacy claims for hypothyroidism medications (including levothyroxine, liothyronine, desiccated thyroid, liotrix, and thyroglobulin).

<sup>d</sup>Total medical costs included inpatient, ED, and outpatient costs.

<sup>e</sup>Total costs were the sum of medical and pharmacy costs.
